# Supplementary material for: Qualitative Analysis of Multiple Phytochemical Compounds in Tojapride Based on UHPLC Q-Exactive Orbitrap Mass Spectrometry
Source: MDPI journal article supplement (doi:10.3390/molecules27196639), 2022-10-06
Supplement: s1 [file s1]

Supplementary Table S1: Retention times and mass spectral data of Tojapride.

| Peak | t <sub>R</sub> | Theoretical Mass <i>m/z</i> | Experimental Mass <i>m/z</i> | Error (ppm) | Formula                                         | MS/MS fragment (-)                                                        | MS/MS fragment (+) | Identification                          |
|------|----------------|-----------------------------|------------------------------|-------------|-------------------------------------------------|---------------------------------------------------------------------------|--------------------|-----------------------------------------|
| 1    | 0.88*          | 191.0561                    | 191.0553                     | -4.25       | C <sub>7</sub> H <sub>12</sub> O <sub>6</sub>   | MS <sup>2</sup> [191]:<br>111.0075(100),<br>87.0074(52),<br>85.0282(46)   |                    | Quinic acid                             |
| 2    | 0.94*          | 133.0142                    | 133.0132                     | -7.87       | C <sub>4</sub> H <sub>6</sub> O <sub>5</sub>    | MS <sup>2</sup> [133]:<br>115.9657(100),<br>71.0125(59),<br>133.0132(31)  |                    | Malic Acid                              |
| 3    | 1.29           | 331.0671                    | 331.0674                     | 1.03        | C <sub>13</sub> H <sub>16</sub> O <sub>10</sub> | MS <sup>2</sup> [331]:<br>169.0134(100),<br>125.0233(83)                  |                    | 1-Galloyl-β-glucose isomer              |
| 4    | 1.46*          | 129.0193                    | 129.0183                     | -8.00       | C <sub>5</sub> H <sub>6</sub> O <sub>4</sub>    | MS <sup>2</sup> [129]: 85.0282(100)                                       |                    | Citraconic acid                         |
| 5    | 1.46*          | 169.0142                    | 169.0135                     | -4.65       | C <sub>7</sub> H <sub>6</sub> O <sub>5</sub>    | MS <sup>2</sup> [169]:<br>125.0232(100)                                   |                    | Gallic acid                             |
| 6    | 1.96           | 197.0455                    | 197.0450                     | -2.77       | C <sub>9</sub> H <sub>10</sub> O <sub>5</sub>   | MS <sup>2</sup> [197]:<br>179.03429(100),<br>152.8941(4)                  |                    | alpha-(3,4-dihydroxyphenyl) lactic acid |
| 7    | 2.05           | 331.0671                    | 331.0675                     | 1.42        | C <sub>13</sub> H <sub>16</sub> O <sub>10</sub> | MS <sup>2</sup> [331]:<br>169.0134(100),<br>125.0233(80)                  |                    | 1-Galloyl-β-glucose isomer              |
| 8    | 2.42*          | 153.0193                    | 153.0184                     | -6.09       | C <sub>7</sub> H <sub>6</sub> O <sub>4</sub>    | MS <sup>2</sup> [153]:<br>109.0283(100)                                   |                    | Protocatechuic acid                     |
| 9    | 3.08*          | 353.0878                    | 353.0881                     | 0.84        | C <sub>16</sub> H <sub>18</sub> O <sub>9</sub>  | MS <sup>2</sup> [353]:<br>191.0554(100),<br>135.0441(73),<br>179.0342(52) |                    | Chlorogenic acid                        |
| 10   | 4.03           | 153.0193                    | 153.0184                     | -5.96       | C <sub>7</sub> H <sub>6</sub> O <sub>4</sub>    | MS <sup>2</sup> [153]:<br>109.0283(100)                                   |                    | Protocatechuic acid isomer              |
| 11   | 4.24*          | 183.0300                    | 183.029                      | -3.53       | C <sub>8</sub> H <sub>8</sub> O <sub>5</sub>    | MS <sup>2</sup> [183]:<br>140.0105(100),                                  |                    | Methyl gallate                          |

|    |       |          |          |       |                                                              |                                                                                                    |                                      |  |
|----|-------|----------|----------|-------|--------------------------------------------------------------|----------------------------------------------------------------------------------------------------|--------------------------------------|--|
|    |       |          |          |       |                                                              | 124.0154(33),<br>168.0054(10),<br>111.0074(5)                                                      |                                      |  |
| 12 | 5.57  | 153.0193 | 153.0184 | -5.89 | C <sub>7</sub> H <sub>6</sub> O <sub>4</sub>                 | MS <sup>2</sup> [153]:<br>109.0283(100)<br>MS <sup>2</sup> [193]:                                  | Protocatechuic acid<br>isomer        |  |
| 13 | 6.11  | 193.0506 | 193.0499 | -3.74 | C <sub>10</sub> H <sub>10</sub> O <sub>4</sub>               | 134.0362(100),<br>178.0265(29),<br>149.0597(18)                                                    | Isoferulic acid<br>isomer            |  |
| 14 | 6.29* | 353.0878 | 353.0881 | 0.84  | C <sub>16</sub> H <sub>18</sub> O <sub>9</sub>               | MS <sup>2</sup> [353]:191.0554(100),<br>135.0441(13),<br>179.0342(8)                               | Cryptochlorogenic<br>acid            |  |
| 15 | 6.37* | 179.0350 | 179.0343 | -3.98 | C <sub>9</sub> H <sub>8</sub> O <sub>4</sub>                 | MS <sup>2</sup> [179]:<br>135.0441(100)<br>MS <sup>2</sup> [193]:                                  | Caffeic acid                         |  |
| 16 | 7.53  | 193.0506 | 193.0500 | -3.17 | C <sub>10</sub> H <sub>10</sub> O <sub>4</sub>               | 135.0441(100),<br>134.0362(17),<br>178.0267(9)<br>MS <sup>2</sup> [771]:                           | Isoferulic acid<br>isomer            |  |
| 17 | 8.34  | 771.1989 | 771.2001 | 1.55  | C <sub>33</sub> H <sub>40</sub> O <sub>21</sub>              | 301.0359(100),<br>300.0273(27),463.0892(10),<br>609.1465(6)<br>MS <sup>2</sup> [173]: 93.033(100), | Quercetin-O-<br>glucoside-rutinoside |  |
| 18 | 8.80* | 173.0819 | 173.0812 | -4.52 | C <sub>8</sub> H <sub>14</sub> O <sub>4</sub>                | 111.0803(41),<br>83.0489(8)<br>MS <sup>2</sup> [193]:149.0599(100)                                 | Octanedioic acid                     |  |
| 19 | 9.03  | 193.0506 | 193.0501 | -2.86 | C <sub>10</sub> H <sub>10</sub> O <sub>4</sub>               | ), 134.0363(10),<br>178.0265(2)<br>MS <sup>2</sup> [593]:                                          | Isoferulic acid<br>isomer            |  |
| 20 | 9.24  | 593.1512 | 593.1519 | 1.23  | C <sub>27</sub> H <sub>30</sub> O <sub>15</sub>              | 353.0676(100),<br>297.0769(59),<br>383.0773(52),<br>473.1092(21)                                   | Vicenin 2 isomer                     |  |
| 21 | 9.54* | 342.1705 | 342.1697 | -0.98 | C <sub>20</sub> H <sub>24</sub> NO <sub>4</sub> <sup>+</sup> | MS <sup>2</sup> [342]:<br>265.0855(100),<br>297.1118(95),                                          | Magnoflorine                         |  |

|    |        |          |          |       |                                                              |                                                                                            |                                         |                                                 |
|----|--------|----------|----------|-------|--------------------------------------------------------------|--------------------------------------------------------------------------------------------|-----------------------------------------|-------------------------------------------------|
|    |        |          |          |       |                                                              |                                                                                            | 237.0907(40),<br>282.0883(36)           |                                                 |
| 22 | 9.87   | 741.2248 | 741.2255 | 1.04  | C <sub>33</sub> H <sub>42</sub> O <sub>19</sub>              | MS <sup>2</sup> [741]:<br>271.0613(100),<br>151.0027(64),<br>119.0491(32)                  |                                         | Naringenin 4'-O-glucoside 7-O-rutinoside isomer |
| 23 | 10.37* | 137.0244 | 137.0235 | -6.62 | C <sub>7</sub> H <sub>6</sub> O <sub>3</sub>                 | MS <sup>2</sup> [137]: 93.0333(100)                                                        |                                         | Salicylic acid                                  |
| 24 | 10.48  | 593.1512 | 593.1521 | 1.53  | C <sub>27</sub> H <sub>30</sub> O <sub>15</sub>              | MS <sup>2</sup> [593]:<br>473.1092(100),<br>353.0672(64),<br>383.0777(36)                  |                                         | Vicenin 2 isomer                                |
| 25 | 10.48  | 609.1461 | 609.1471 | 1.61  | C <sub>27</sub> H <sub>30</sub> O <sub>16</sub>              | MS <sup>2</sup> [609]:<br>285.0406(100),<br>447.0940(85)                                   |                                         | Luteolin-O-Lactoside                            |
| 26 | 10.51  | 741.2248 | 741.2259 | 1.54  | C <sub>33</sub> H <sub>42</sub> O <sub>19</sub>              | MS <sup>2</sup> [741]:<br>151.0027(100),<br>119.0490(34),<br>271.0613(52)                  |                                         | Naringenin 4'-O-glucoside 7-O-rutinoside isomer |
| 27 | 10.60  | 771.1989 | 771.2003 | 1.80  | C <sub>33</sub> H <sub>40</sub> O <sub>21</sub>              | MS <sup>2</sup> [771]:<br>463.0854(100),<br>609.1464(54),<br>301.0355(20)                  |                                         | Quercetin-O-glucoside-rutinoside                |
| 28 | 10.83* | 447.0933 | 447.0937 | 0.84  | C <sub>21</sub> H <sub>20</sub> O <sub>11</sub>              | MS <sup>2</sup> [447]:<br>327.0514(100),<br>357.0619(23),<br>297.0406(13)                  |                                         | Orientin                                        |
| 29 | 10.89  | 609.1461 | 609.1471 | 1.61  | C <sub>27</sub> H <sub>30</sub> O <sub>16</sub>              | MS <sup>2</sup> [609]:<br>447.0937(100),<br>285.0406(22)                                   |                                         | Luteolin-O-Lactoside                            |
| 30 | 10.92  | 417.1191 | 417.1197 | 1.40  | C <sub>21</sub> H <sub>22</sub> O <sub>9</sub>               | MS <sup>2</sup> [417]:<br>119.0491(100),<br>255.0662(70),<br>135.0077(28),<br>153.0183(23) |                                         | Isoliquiritin isomer                            |
| 31 | 11.08  | 505.2306 | 505.2228 | 0.06  | C <sub>26</sub> H <sub>34</sub> NO <sub>9</sub> <sup>+</sup> |                                                                                            | MS <sup>2</sup> [505]:<br>342.1698(100) | Magnoflorine-O-glucoside                        |

|    |        |          |          |       |                                                              |                                                                                            |                                                                                            |                                                         |
|----|--------|----------|----------|-------|--------------------------------------------------------------|--------------------------------------------------------------------------------------------|--------------------------------------------------------------------------------------------|---------------------------------------------------------|
| 32 | 11.18  | 447.0933 | 447.0938 | 1.18  | C <sub>21</sub> H <sub>20</sub> O <sub>11</sub>              | MS <sup>2</sup> [447]:<br>327.0514(100),<br>357.0620(62),<br>297.0410(19)                  |                                                                                            | Orientin isomer                                         |
| 33 | 11.27  | 593.1512 | 593.1519 | 1.23  | C <sub>27</sub> H <sub>30</sub> O <sub>15</sub>              | MS <sup>2</sup> [593]:<br>473.1094(100),<br>353.0672(80),<br>383.0777(75)                  |                                                                                            | Vicenin 2 isomer                                        |
| 34 | 11.40  | 471.2013 | 471.2012 | -0.31 | C <sub>26</sub> H <sub>30</sub> O <sub>8</sub>               |                                                                                            | MS <sup>2</sup> [471]:<br>161.0596(100),<br>425.1975(36),<br>367.1907(11)                  | Limonin isomer                                          |
| 35 | 11.50  | 549.1614 | 549.1620 | 1.14  | C <sub>26</sub> H <sub>30</sub> O <sub>13</sub>              | MS <sup>2</sup> [549]:<br>255.0662(100),<br>119.0491(88),<br>135.0078(51),<br>153.0184(33) |                                                                                            | Liquiritin apioside<br>isomer                           |
| 36 | 11.56* | 417.1191 | 417.1195 | 0.83  | C <sub>21</sub> H <sub>22</sub> O <sub>9</sub>               | MS <sup>2</sup> [417]:<br>255.0662(100),<br>135.0077(53),<br>119.0491(42),<br>153.0184(25) |                                                                                            | Liquiritin                                              |
| 37 | 11.70  | 389.1242 | 389.1245 | 0.74  | C <sub>20</sub> H <sub>22</sub> O <sub>8</sub>               | MS <sup>2</sup> [389]:<br>227.0711(100)                                                    |                                                                                            | Polydatin                                               |
| 38 | 11.76  | 771.2353 | 771.2364 | 1.39  | C <sub>34</sub> H <sub>44</sub> O <sub>20</sub>              | MS <sup>2</sup> [771]:<br>301.0720(100)                                                    |                                                                                            | Hesperidin 7-O-<br>glucoside isomer                     |
| 39 | 11.77  | 342.1705 | 342.1700 | -0.10 | C <sub>20</sub> H <sub>24</sub> NO <sub>4</sub> <sup>+</sup> |                                                                                            | MS <sup>2</sup> [342]:<br>265.0850(100),<br>297.1124(86),<br>282.0883(32),<br>237.0908(29) | Magnoflorine<br>isomer                                  |
| 40 | 11.79  | 741.2248 | 741.2258 | 1.45  | C <sub>33</sub> H <sub>42</sub> O <sub>19</sub>              | MS <sup>2</sup> [741]:<br>151.0028(100),<br>271.0614(41),<br>119.0491(37)                  |                                                                                            | Naringenin 4'-O-<br>glucoside 7-O-<br>rutinoside isomer |

|    |        |          |          |       |                                                              |                                                                                            |                                                         |
|----|--------|----------|----------|-------|--------------------------------------------------------------|--------------------------------------------------------------------------------------------|---------------------------------------------------------|
| 41 | 11.93  | 593.1512 | 593.1519 | 1.12  | C <sub>27</sub> H <sub>30</sub> O <sub>15</sub>              | MS <sup>2</sup> [593]:<br>473.1091(100),<br>353.0669(68),<br>383.0772(66)                  | Vicenin 2 isomer                                        |
| 42 | 11.96* | 431.0984 | 431.0988 | 1.04  | C <sub>21</sub> H <sub>20</sub> O <sub>10</sub>              | MS <sup>2</sup> [431]:<br>311.0564(100),<br>283.0612(30),<br>341.0665(7)                   | Vitexin                                                 |
| 43 | 12.11  | 609.1461 | 609.1458 | -0.59 | C <sub>27</sub> H <sub>30</sub> O <sub>16</sub>              | MS <sup>2</sup> [609]:<br>447.0934(100),<br>285.0406(40)                                   | Luteolin-O-<br>Lactoside                                |
| 44 | 12.16  | 549.1614 | 549.1622 | 1.47  | C <sub>26</sub> H <sub>30</sub> O <sub>13</sub>              | MS <sup>2</sup> [549]:<br>119.0491(100),<br>255.0663(93),<br>135.0078(74),<br>153.0185(46) | Liquiritin apioside<br>isomer                           |
| 45 | 12.31  | 263.1288 | 263.1292 | 1.02  | C <sub>15</sub> H <sub>20</sub> O <sub>4</sub>               | MS <sup>2</sup> [263]:<br>219.1388(100),<br>201.1280(14),<br>204.1151(9)                   | Absciscic acid isomer                                   |
| 46 | 12.42  | 255.0663 | 255.0657 | -2.32 | C <sub>15</sub> H <sub>12</sub> O <sub>4</sub>               | MS <sup>2</sup> [255]:<br>119.0488(100),<br>135.0074(28),<br>153.0181(13)                  | Liquiritigenin<br>isomer                                |
| 47 | 12.48  | 741.2248 | 741.2263 | 2.03  | C <sub>33</sub> H <sub>42</sub> O <sub>19</sub>              | MS <sup>2</sup> [741]:<br>151.0028(100),<br>119.0491(36),<br>271.0615(46)                  | Naringenin 4'-O-<br>glucoside 7-O-<br>rutinoside isomer |
| 48 | 12.50  | 342.1705 | 342.1700 | -0.10 | C <sub>20</sub> H <sub>24</sub> NO <sub>4</sub> <sup>+</sup> | MS <sup>2</sup> [342]:<br>265.0864(100),<br>297.1119(54),<br>237.0903(23)                  | Magnoflorine<br>isomer                                  |
| 49 | 12.66  | 463.0882 | 463.0892 | 2.23  | C <sub>21</sub> H <sub>20</sub> O <sub>12</sub>              | MS <sup>2</sup> [463]:<br>301.0355(100),<br>300.0275(15),<br>151.0027(14)                  | Hyperoside isomer                                       |

|    |        |          |          |       |                                                              |                                                                                            |                                                          |                                   |
|----|--------|----------|----------|-------|--------------------------------------------------------------|--------------------------------------------------------------------------------------------|----------------------------------------------------------|-----------------------------------|
| 50 | 12.72  | 609.1461 | 609.1473 | 1.92  | C <sub>27</sub> H <sub>30</sub> O <sub>16</sub>              | MS <sup>2</sup> [609]:<br>301.0355(100),<br>151.0026(17),<br>300.0272(5)                   |                                                          | Rutin isomer                      |
| 51 | 12.75  | 447.0933 | 447.0938 | 1.04  | C <sub>21</sub> H <sub>20</sub> O <sub>11</sub>              | MS <sup>2</sup> [447]:<br>285.0406(100)                                                    |                                                          | Luteolin 7-O-β-D-glucoside isomer |
| 52 | 12.80  | 593.1512 | 593.1526 | 2.36  | C <sub>27</sub> H <sub>30</sub> O <sub>15</sub>              | MS <sup>2</sup> [593]:<br>383.0772(100),<br>353.0669(68),<br>473.1091(65)                  |                                                          | Vicenin 2 isomer                  |
| 53 | 12.95* | 463.0882 | 463.0890 | 1.64  | C <sub>21</sub> H <sub>20</sub> O <sub>12</sub>              | MS <sup>2</sup> [463]:<br>300.0277(100),<br>301.0353(81),<br>151.0027(10)                  |                                                          | Hyperoside                        |
| 54 | 12.95* | 193.0506 | 193.0502 | -2.29 | C <sub>10</sub> H <sub>10</sub> O <sub>4</sub>               | MS <sup>2</sup> [193]:<br>161.0236(100),<br>134.0362(63),<br>178.0268(18),<br>149.0597(10) |                                                          | Isoferulic acid                   |
| 55 | 13.07* | 609.1461 | 609.1475 | 2.22  | C <sub>27</sub> H <sub>30</sub> O <sub>16</sub>              | MS <sup>2</sup> [609]:<br>300.0216(100),<br>271.0249(65),<br>301.0361(39),<br>151.0031(17) |                                                          | Rutin                             |
| 56 | 13.07  | 431.0984 | 431.0990 | 1.53  | C <sub>21</sub> H <sub>20</sub> O <sub>10</sub>              | MS <sup>2</sup> [431]:<br>311.0564(100),<br>341.0669(35),<br>283.0613(25)                  |                                                          | Vitexin isomer                    |
| 57 | 13.08  | 342.1705 | 324.1230 | -0.05 | C <sub>20</sub> H <sub>24</sub> NO <sub>4</sub> <sup>+</sup> |                                                                                            | MS <sup>2</sup> [342]:<br>265.0860(100),<br>237.0909(10) | Magnoflorine isomer               |
| 58 | 13.18  | 771.2353 | 771.2368 | 1.95  | C <sub>34</sub> H <sub>44</sub> O <sub>20</sub>              | MS <sup>2</sup> [771]:<br>301.0720(100),<br>151.0027(37),<br>286.0476(17),<br>242.0591(14) |                                                          | Hesperidin 7-O-glucoside isomer   |

|    |        |          |          |       |                                                 |                                                                                |                                 |
|----|--------|----------|----------|-------|-------------------------------------------------|--------------------------------------------------------------------------------|---------------------------------|
| 59 | 13.18* | 187.0976 | 187.0971 | -2.79 | C <sub>9</sub> H <sub>16</sub> O <sub>4</sub>   | MS <sup>2</sup> [187]:125.0161(100), 187.0970(50), 97.0647(11)                 | Azelaic acid                    |
| 60 | 13.30* | 463.0882 | 463.0892 | 2.16  | C <sub>21</sub> H <sub>20</sub> O <sub>12</sub> | MS <sup>2</sup> [463]: 300.0277(100), 301.0352(58)                             | Isoquercitrin                   |
| 61 | 13.42  | 609.1461 | 609.1475 | 2.22  | C <sub>27</sub> H <sub>30</sub> O <sub>16</sub> | MS <sup>2</sup> [609]: 301.0356(100), 300.0279(41), 151.0027(10)               | Rutin isomer                    |
| 62 | 13.42  | 771.2353 | 771.2369 | 2.03  | C <sub>34</sub> H <sub>44</sub> O <sub>20</sub> | MS <sup>2</sup> [771]: 301.0720(100), 151.0027(32), 286.0482(18), 242.0578(17) | Hesperidin 7-O-glucoside isomer |
| 63 | 13.56* | 447.0933 | 447.0934 | 0.21  | C <sub>21</sub> H <sub>20</sub> O <sub>11</sub> | MS <sup>2</sup> [447]: 285.0406(100), 151.0026(6), 133.0283(6)                 | Luteolin 7-O-β-D-glucoside      |
| 64 | 13.56* | 593.1512 | 579.1726 | 1.18  | C <sub>27</sub> H <sub>30</sub> O <sub>15</sub> | MS <sup>2</sup> [593]: 284.0332(100), 151.0030(4), 107.0126(2)                 | Kaempferol 3-O-neohesperidoside |
| 65 | 13.62  | 579.1719 | 579.1724 | 0.75  | C <sub>27</sub> H <sub>32</sub> O <sub>14</sub> | MS <sup>2</sup> [579]: 271.0615(100), 151.0028(67), 119.0491(43)               | Narirutin isomer                |
| 66 | 13.68  | 461.0725 | 461.0731 | 1.11  | C <sub>21</sub> H <sub>18</sub> O <sub>12</sub> | MS <sup>2</sup> [461]: 285.0406(100), 133.0284(8), 151.0030(3), 199.0397(2)    | Luteolin 7-O-glucuronide        |
| 67 | 13.73  | 271.0612 | 271.0614 | 0.86  | C <sub>15</sub> H <sub>12</sub> O <sub>5</sub>  | MS <sup>2</sup> [271]: 119.0491(100), 151.0028(78), 177.0186(8)                | Naringenin isomer               |

|    |       |          |          |       |                                                              |                                                                                            |                                                 |
|----|-------|----------|----------|-------|--------------------------------------------------------------|--------------------------------------------------------------------------------------------|-------------------------------------------------|
| 68 | 13.76 | 433.1140 | 433.1144 | 0.97  | C <sub>21</sub> H <sub>22</sub> O <sub>10</sub>              | MS <sup>2</sup> [433]:<br>271.0616(100),<br>151.0028(53),<br>119.0492(52)                  | Naringenin 7-O-glucoside isomer                 |
| 69 | 13.88 | 771.2353 | 771.2371 | 2.26  | C <sub>34</sub> H <sub>44</sub> O <sub>20</sub>              | MS <sup>2</sup> [771]:<br>301.0721(100),<br>151.0028(58(58),242.05<br>85(16), 286.0495(15) | Hesperidin 7-O-glucoside isomer                 |
| 70 | 14.08 | 263.1288 | 263.1293 | 1.47  | C <sub>15</sub> H <sub>20</sub> O <sub>4</sub>               | MS <sup>2</sup> [263]:<br>219.1387(100),<br>201.1278(6),<br>204.1148(4)                    | Abscisic acid isomer                            |
| 71 | 14.17 | 593.1512 | 579.1729 | 1.59  | C <sub>27</sub> H <sub>30</sub> O <sub>15</sub>              | MS <sup>2</sup> [593]:<br>284.0308(100),<br>151.0029(6),107.0128(4<br>)                    | Kaempferol 3-O-neohesperidoside isomer          |
| 72 | 14.17 | 741.2248 | 741.2263 | 2.03  | C <sub>33</sub> H <sub>42</sub> O <sub>19</sub>              | MS <sup>2</sup> [741]:<br>151.0028(100),<br>271.0617(75),<br>119.0491(44)                  | Naringenin 4'-O-glucoside 7-O-rutinoside isomer |
| 73 | 14.23 | 433.1140 | 433.1144 | 0.97  | C <sub>21</sub> H <sub>22</sub> O <sub>10</sub>              | MS <sup>2</sup> [433]:<br>271.0614(100),<br>151.0028(57),<br>119.0491(41)                  | Naringenin 7-O-glucoside isomer                 |
| 74 | 14.30 | 324.1236 | 324.1226 | -1.28 | C <sub>19</sub> H <sub>18</sub> NO <sub>4</sub> <sup>+</sup> | MS <sup>2</sup> [324]:<br>309.0992(100),<br>280.0966(92),<br>266.0809(29),<br>294.0757(26) | Demethyleneberberine                            |
| 75 | 14.37 | 271.0612 | 271.0614 | 0.86  | C <sub>15</sub> H <sub>12</sub> O <sub>5</sub>               | MS <sup>2</sup> [271]:<br>119.0491(100),<br>151.0027(35),<br>177.0186(5)                   | Naringenin isomer                               |
| 76 | 14.40 | 579.1719 | 579.1724 | 0.75  | C <sub>27</sub> H <sub>32</sub> O <sub>14</sub>              | MS <sup>2</sup> [579]:<br>151.0028(100),                                                   | Narirutin isomer                                |



|    |        |          |           |       |                                                              |                                                                           |                                                                                           |                                                         |
|----|--------|----------|-----------|-------|--------------------------------------------------------------|---------------------------------------------------------------------------|-------------------------------------------------------------------------------------------|---------------------------------------------------------|
|    |        |          |           |       |                                                              | 271.0614(51),<br>119.0491(41)                                             |                                                                                           |                                                         |
| 77 | 14.55  | 322.1079 | 322.1072  | -0.64 | C <sub>19</sub> H <sub>16</sub> NO <sub>4</sub> <sup>+</sup> |                                                                           | MS <sup>2</sup> [322]:<br>307.0837(100),<br>279.0887(37)                                  | Groenlandicine                                          |
| 78 | 14.71  | 741.2248 | 741.22632 | 2.12  | C <sub>33</sub> H <sub>42</sub> O <sub>19</sub>              | MS <sup>2</sup> [741]:<br>151.0028(100),<br>271.0616(58),<br>119.0492(43) |                                                                                           | Naringenin 4'-O-<br>glucoside 7-O-<br>rutinoside isomer |
| 79 | 14.97* | 593.1512 | 593.1524  | 2.03  | C <sub>27</sub> H <sub>30</sub> O <sub>15</sub>              | MS <sup>2</sup> [593]:<br>285.0406(100)                                   |                                                                                           | Nicotiflorin                                            |
| 80 | 15.09  | 447.0933 | 447.0941  | 1.73  | C <sub>21</sub> H <sub>20</sub> O <sub>11</sub>              | MS <sup>2</sup> [447]:<br>285.0408(100)                                   |                                                                                           | Luteolin 7-O-β-D-<br>glucoside isomer                   |
| 81 | 15.23* | 609.1825 | 609.1834  | 1.41  | C <sub>28</sub> H <sub>34</sub> O <sub>15</sub>              | MS <sup>2</sup> [609]:301.0720(100),<br>151.0027(16),<br>286.0488(10)     |                                                                                           | Hesperidin                                              |
| 82 | 15.27  | 324.1236 | 324.1228  | -0.63 | C <sub>19</sub> H <sub>18</sub> NO <sub>4</sub> <sup>+</sup> |                                                                           | MS <sup>2</sup> [324]:<br>309.0993(100),<br>294.0759(73),<br>266.0809(22),<br>280.0967(6) | Demethyleneberberine                                    |
| 83 | 15.27  | 338.1392 | 338.1384  | -0.75 | C <sub>20</sub> H <sub>20</sub> NO <sub>4</sub> <sup>+</sup> |                                                                           | MS <sup>2</sup> [338]:<br>322.1071(100),<br>308.0916(10),<br>294.1120(4)                  | Columbamine                                             |
| 84 | 15.37  | 301.0354 | 301.0360  | 2.11  | C <sub>15</sub> H <sub>10</sub> O <sub>7</sub>               | MS <sup>2</sup> [301]:<br>151.0027(100),<br>107.0126(40)                  |                                                                                           | Quercetin isomer                                        |
| 85 | 15.52  | 771.2353 | 771.2367  | 1.78  | C <sub>34</sub> H <sub>44</sub> O <sub>20</sub>              | MS <sup>2</sup> [771]:<br>301.0719(100)                                   |                                                                                           | Hesperidin 7-O-<br>glucoside isomer                     |
| 86 | 15.55  | 593.1512 | 593.1522  | 1.73  | C <sub>27</sub> H <sub>30</sub> O <sub>15</sub>              | MS <sup>2</sup> [593]:<br>285.04065(100)                                  |                                                                                           | Nicotiflorin isomer                                     |
| 87 | 15.63  | 301.0718 | 301.0721  | 0.96  | C <sub>16</sub> H <sub>14</sub> O <sub>6</sub>               | MS <sup>2</sup> [301]:<br>151.0027(100),<br>286.0484(33)                  |                                                                                           | Hesperetin isomer                                       |

|    |        |          |          |       |                                                              |                                                                                            |                                 |
|----|--------|----------|----------|-------|--------------------------------------------------------------|--------------------------------------------------------------------------------------------|---------------------------------|
| 88 | 15.63  | 463.1246 | 463.1248 | 2.74  | C <sub>22</sub> H <sub>24</sub> O <sub>11</sub>              | MS <sup>2</sup> [463]:<br>301.0720(100),<br>151.0028(13),<br>286.0483(9),<br>242.0584(7)   | Hesperetin 7-O-β-D-glucuronide  |
| 89 | 15.63  | 431.0984 | 431.0990 | 1.39  | C <sub>21</sub> H <sub>20</sub> O <sub>10</sub>              | MS <sup>2</sup> [431]:<br>269.0456(100)                                                    | Aloe Emodin 8-glucoside isomer  |
| 90 | 15.85  | 324.1236 | 324.1228 | -0.63 | C <sub>19</sub> H <sub>18</sub> NO <sub>4</sub> <sup>+</sup> | MS <sup>2</sup> [324]:<br>309.0994(100),<br>280.0967(20),<br>294.0759(9),<br>266.0814(4)   | Demethyleneberberine            |
| 91 | 15.97  | 609.1825 | 609.1830 | 0.80  | C <sub>28</sub> H <sub>34</sub> O <sub>15</sub>              | MS <sup>2</sup> [609]:<br>301.0721(100),<br>151.0028(30),<br>286.0484(21)                  | Neohesperidin                   |
| 92 | 16.20  | 445.1140 | 445.1145 | 1.08  | C <sub>22</sub> H <sub>22</sub> O <sub>10</sub>              | MS <sup>2</sup> [445]:<br>283.0613(100),<br>268.0378(10),<br>269.0421(1)                   | Oroxylin A-O-glucoside          |
| 93 | 16.20  | 771.2353 | 771.2366 | 1.70  | C <sub>34</sub> H <sub>44</sub> O <sub>20</sub>              | MS <sup>2</sup> [771]:<br>301.0719(100),<br>151.0026(28),<br>286.0469(21),<br>242.0580(12) | Hesperidin 7-O-glucoside isomer |
| 94 | 16.32  | 623.1618 | 623.1627 | 1.54  | C <sub>28</sub> H <sub>32</sub> O <sub>16</sub>              | MS <sup>2</sup> [623]:<br>315.0514(100),<br>300.0276(72),<br>151.0027(12),<br>271.0252(5)  | Methyl-quercetin-O-rutinoside   |
| 95 | 16.57  | 445.1140 | 445.1146 | 1.35  | C <sub>22</sub> H <sub>22</sub> O <sub>10</sub>              | MS <sup>2</sup> [445]:<br>283.0615(100),<br>269.0451(17),<br>268.0383(16)                  | Oroxylin A-O-glucoside          |
| 96 | 16.60* | 263.1288 | 263.1293 | 1.47  | C <sub>15</sub> H <sub>20</sub> O <sub>4</sub>               | MS <sup>2</sup> [263]:<br>219.1386(100),                                                   | Abscisic acid                   |

|     |        |          |          |       |                                                              |                                                                                                               |                                   |
|-----|--------|----------|----------|-------|--------------------------------------------------------------|---------------------------------------------------------------------------------------------------------------|-----------------------------------|
| 97  | 16.69  | 621.1825 | 621.1835 | 1.70  | C <sub>29</sub> H <sub>34</sub> O <sub>15</sub>              | 204.1150(82),<br>201.1279(29)<br>MS <sup>2</sup> [621]:<br>151.0027(100),<br>119.0491(64),<br>271.0612(64(64) | Naringenin<br>derivative          |
| 98  | 16.73  | 322.1079 | 322.1072 | -0.73 | C <sub>19</sub> H <sub>16</sub> NO <sub>4</sub> <sup>+</sup> | MS <sup>2</sup> [322]:<br>307.0837(100),<br>279.0888(18)                                                      | Groenlandicine                    |
| 99  | 16.89  | 623.1618 | 623.1628 | 1.74  | C <sub>28</sub> H <sub>32</sub> O <sub>16</sub>              | MS <sup>2</sup> [623]:<br>300.0276(100),<br>315.0512(85),<br>151.0028(19),<br>271.0253(6)                     | Methyl-quercetin-O-<br>rutinoside |
| 100 | 16.90  | 320.0923 | 320.0916 | -0.29 | C <sub>19</sub> H <sub>14</sub> NO <sub>4</sub> <sup>+</sup> | MS <sup>2</sup> [320]:292.0966(100), 277.0732(46),<br>262.0859(43),<br>234.0912(22)                           | Coptisine                         |
| 101 | 16.92* | 287.0561 | 287.0565 | 1.42  | C <sub>15</sub> H <sub>12</sub> O <sub>6</sub>               | MS <sup>2</sup> [287]:<br>135.0441(100),<br>107.0126(23),<br>151.0027(21)                                     | Eriodictyol                       |
| 102 | 16.93  | 338.1392 | 338.1384 | -0.84 | C <sub>20</sub> H <sub>20</sub> NO <sub>4</sub> <sup>+</sup> | MS <sup>2</sup> [338]:<br>322.1072(100),<br>294.1122(73),<br>308.0915(45)                                     | Columbamine                       |
| 103 | 17.00  | 621.1825 | 621.1834 | 1.48  | C <sub>29</sub> H <sub>34</sub> O <sub>15</sub>              | MS <sup>2</sup> [621]:<br>151.0027(100),<br>271.0614(59),<br>119.0491(57)                                     | Naringenin<br>derivative          |
| 104 | 17.16  | 336.1240 | 336.1230 | -0.13 | C <sub>20</sub> H <sub>18</sub> NO <sub>4</sub> <sup>+</sup> | MS <sup>2</sup> [336]:<br>320.0916(100),<br>292.0965(37),<br>321.0995(13),<br>278.1816(1)                     | Berberine isomer                  |

|     |        |          |           |       |                                                              |                                                                                            |                                                                                                         |
|-----|--------|----------|-----------|-------|--------------------------------------------------------------|--------------------------------------------------------------------------------------------|---------------------------------------------------------------------------------------------------------|
| 105 | 17.20  | 459.1297 | 459.13034 | 1.46  | C <sub>23</sub> H <sub>24</sub> O <sub>10</sub>              | MS <sup>2</sup> [459]:<br>255.0663(100),<br>135.0077(35),<br>153.0184(26),<br>119.0490(20) | 6'-Acetyllicquiritin<br>isomer                                                                          |
| 106 | 17.22  | 338.1392 | 338.1384  | -0.75 | C <sub>20</sub> H <sub>20</sub> NO <sub>4</sub> <sup>+</sup> |                                                                                            | MS <sup>2</sup> [338]:<br>322.1071(100),<br>294.1122(70),<br>308.0913(43)<br>Columbamine                |
| 107 | 17.46  | 431.0984 | 431.0989  | 1.32  | C <sub>21</sub> H <sub>20</sub> O <sub>10</sub>              | MS <sup>2</sup> [431]:<br>269.0459(100)                                                    | Aloe Emodin 8-<br>glucoside isomer                                                                      |
| 108 | 17.53  | 320.0923 | 320.0918  | 0.21  | C <sub>19</sub> H <sub>14</sub> NO <sub>4</sub> <sup>+</sup> |                                                                                            | MS <sup>2</sup> [320]:<br>292.0966(100),<br>277.0732(41),<br>262.0860(34),<br>234.0915(18)<br>Coptisine |
| 109 | 17.55  | 621.1825 | 621.1837  | 1.86  | C <sub>29</sub> H <sub>34</sub> O <sub>15</sub>              | MS <sup>2</sup> [621]:<br>151.0027(100),<br>271.0613(64),<br>119.0490(56)                  | Naringenin<br>derivative                                                                                |
| 110 | 17.98  | 549.1614 | 549.1621  | 1.36  | C <sub>26</sub> H <sub>30</sub> O <sub>13</sub>              | MS <sup>2</sup> [549]:<br>119.0491(100),<br>255.0663(88),<br>135.0078(65),<br>153.0184(49) | Liquiritin apioside<br>isomer                                                                           |
| 111 | 18.01* | 445.0776 | 445.07809 | 1.02  | C <sub>21</sub> H <sub>18</sub> O <sub>11</sub>              | MS <sup>2</sup> [445]:269.0457(100),<br>161.0447(4)                                        | Baicalin                                                                                                |
| 112 | 18.12* | 417.1191 | 417.1195  | 0.97  | C <sub>21</sub> H <sub>22</sub> O <sub>9</sub>               | MS <sup>2</sup> [417]:<br>255.0662(100),<br>135.0077(53),<br>119.0491(42),<br>153.0184(25) | Isoliquiritin                                                                                           |
| 113 | 18.18  | 579.1719 | 579.1726  | 1.18  | C <sub>27</sub> H <sub>32</sub> O <sub>14</sub>              | MS <sup>2</sup> [579]:<br>151.0027(100),<br>271.0613(52),<br>119.0491(46)                  | Narirutin isomer                                                                                        |

|     |        |          |          |       |                                                              |                                                                                            |                                                                                            |                               |
|-----|--------|----------|----------|-------|--------------------------------------------------------------|--------------------------------------------------------------------------------------------|--------------------------------------------------------------------------------------------|-------------------------------|
| 114 | 18.40  | 338.1392 | 338.1385 | -0.58 | C <sub>20</sub> H <sub>20</sub> NO <sub>4</sub> <sup>+</sup> |                                                                                            | MS <sup>2</sup> [338]:<br>322.1071(100),<br>294.1118(26),<br>308.1177(5)                   | Columbamine                   |
| 115 | 18.50  | 549.1614 | 549.1620 | 1.14  | C <sub>26</sub> H <sub>30</sub> O <sub>13</sub>              | MS <sup>2</sup> [549]:<br>255.0662(100),<br>119.0491(84),<br>135.0077(53),<br>153.0185(34) |                                                                                            | Liquiritin apioside<br>isomer |
| 116 | 18.54  | 322.1079 | 322.1072 | -0.73 | C <sub>19</sub> H <sub>16</sub> NO <sub>4</sub> <sup>+</sup> |                                                                                            | MS <sup>2</sup> [322]:<br>307.0836(100),<br>279.0889(19)                                   | Groenlandicine                |
| 117 | 18.66  | 352.1550 | 352.1541 | -0.55 | C <sub>21</sub> H <sub>22</sub> NO <sub>4</sub> <sup>+</sup> |                                                                                            | MS <sup>2</sup> [352]:<br>336.1226(100),<br>308.1277(66),<br>294.1122(35),<br>322.1069(30) | Palmatine                     |
| 118 | 18.73  | 417.1191 | 417.1195 | 0.97  | C <sub>21</sub> H <sub>22</sub> O <sub>9</sub>               | MS <sup>2</sup> [417]:<br>119.0491(100),<br>255.0662(77),<br>135.0078(30),<br>153.0184(25) |                                                                                            | Isoliquiritin isomer          |
| 119 | 19..81 | 285.0768 | 285.0766 | -0.87 | C <sub>16</sub> H <sub>14</sub> O <sub>5</sub>               | MS <sup>2</sup> [285]:<br>164.0106(100),<br>151.0028(60)                                   |                                                                                            | Sakuranetin isomer            |
| 120 | 19.17  | 255.0663 | 255.0657 | -2.32 | C <sub>15</sub> H <sub>12</sub> O <sub>4</sub>               | MS <sup>2</sup> [255]:<br>119.0488(100),<br>135.0074(28),<br>153.0181(13)                  |                                                                                            | Liquiritigenin<br>isomer      |
| 121 | 19.47  | 336.1240 | 336.1225 | 0.98  | C <sub>20</sub> H <sub>18</sub> NO <sub>4</sub> <sup>+</sup> |                                                                                            | MS <sup>2</sup> [336]:<br>320.0914(100),<br>292.0964(91),<br>321.0994(51),<br>278.0810(35) | Berberine isomer              |
| 122 | 19.49* | 283.0612 | 283.0613 | 0.51  | C <sub>16</sub> H <sub>12</sub> O <sub>5</sub>               | MS <sup>2</sup> [283]:<br>268.0379(100),                                                   |                                                                                            | Calycosin                     |

|     |        |          |          |       |                                                              |                                                                                                                                                                                                                                                                       |                       |
|-----|--------|----------|----------|-------|--------------------------------------------------------------|-----------------------------------------------------------------------------------------------------------------------------------------------------------------------------------------------------------------------------------------------------------------------|-----------------------|
| 123 | 19.54* | 301.0354 | 301.0355 | 0.48  | C <sub>15</sub> H <sub>10</sub> O <sub>7</sub>               | 211.0395(20),<br>239.0354(10)<br>MS <sup>2</sup> [301]:<br>151.0028(100),<br>107.0127(56)<br>MS <sup>2</sup> [609]:<br>301.0721(100),<br>151.0028(32),<br>286.0485(19),<br>242.0582(15)<br>MS <sup>2</sup> [593]:<br>285.0769(100),<br>164.0107(17),<br>151.00279(11) | Quercetin             |
| 124 | 19.69  | 609.1825 | 609.1832 | 1.21  | C <sub>28</sub> H <sub>34</sub> O <sub>15</sub>              | MS <sup>2</sup> [352]:<br>336.1227(100),<br>308.1277(64),<br>294.1123(38),<br>322.1071(31)                                                                                                                                                                            | Hesperidin isomer     |
| 125 | 19.78  | 593.1876 | 593.1877 | 0.27  | C <sub>28</sub> H <sub>34</sub> O <sub>14</sub>              | MS <sup>2</sup> [285]:<br>133.0186(100),<br>151.0028(30),<br>175.0392(18),<br>199.0394(11)<br>MS <sup>2</sup> [621]:<br>151.0027(100),<br>271.0614(55),<br>119.0491(45)                                                                                               | Poncirin isomer       |
| 126 | 19.97  | 352.1550 | 352.1540 | -0.98 | C <sub>21</sub> H <sub>22</sub> NO <sub>4</sub> <sup>+</sup> |                                                                                                                                                                                                                                                                       | Palmatine             |
| 127 | 20.10* | 285.0405 | 285.0407 | 0.98  | C <sub>15</sub> H <sub>10</sub> O <sub>6</sub>               | MS <sup>2</sup> [336]:<br>320.0915(100),<br>292.0965(89),<br>321.0994(55),<br>278.0810(32)                                                                                                                                                                            | Luteolin              |
| 128 | 20.21  | 621.1825 | 621.1832 | 1.19  | C <sub>29</sub> H <sub>34</sub> O <sub>15</sub>              |                                                                                                                                                                                                                                                                       | Naringenin derivative |
| 129 | 20.37  | 336.1240 | 336.1229 | -0.52 | C <sub>20</sub> H <sub>18</sub> NO <sub>4</sub> <sup>+</sup> |                                                                                                                                                                                                                                                                       | Berberine isomer      |
| 130 | 20.53  | 593.1876 | 593.1877 | 0.27  | C <sub>28</sub> H <sub>34</sub> O <sub>14</sub>              | MS <sup>2</sup> [593]:<br>285.0769(100),                                                                                                                                                                                                                              | Poncirin isomer       |

|     |        |          |          |      |                                                 |                                                                                                                                                                                                                                                                                                                                                                                                                                                                                                                                                                                                                                                                                                                            |  |
|-----|--------|----------|----------|------|-------------------------------------------------|----------------------------------------------------------------------------------------------------------------------------------------------------------------------------------------------------------------------------------------------------------------------------------------------------------------------------------------------------------------------------------------------------------------------------------------------------------------------------------------------------------------------------------------------------------------------------------------------------------------------------------------------------------------------------------------------------------------------------|--|
|     |        |          |          |      |                                                 | 151.0028(20),<br>164.0106(16)<br>MS <sup>2</sup> [271]:<br>119.0491(100),<br>151.0027(76),<br>177.0186((10),<br>227.0710(1)<br>MS <sup>2</sup> [621]:<br>151.0027(100),<br>119.0491(49),<br>271.0614(38)<br>MS <sup>2</sup> [285]:<br>133.0284(100),<br>199.0394(30),<br>151.0027(11),<br>175.0392(6)<br>MS <sup>2</sup> [431]:<br>269.0458(100),<br>225.0555(18),<br>241.0458(4)<br>MS <sup>2</sup> [853]:<br>351.0570(100),<br>193.0347(20),<br>113.0229(14)<br>MS <sup>2</sup> [263]:<br>219.1388(100),<br>204.1152(15),<br>201.1280(6)<br>MS <sup>2</sup> [301]:151.0027(100),<br>286.0484(27)<br>MS <sup>2</sup> [853]:<br>351.0577(100),<br>193.0348(13)<br>MS <sup>2</sup> [853]:<br>351.0569(100),<br>113.0250(16) |  |
| 131 | 20.56* | 271.0612 | 271.0613 | 0.42 | C <sub>15</sub> H <sub>12</sub> O <sub>5</sub>  | Naringenin                                                                                                                                                                                                                                                                                                                                                                                                                                                                                                                                                                                                                                                                                                                 |  |
| 132 | 21.02  | 621.1825 | 621.1832 | 1.09 | C <sub>29</sub> H <sub>34</sub> O <sub>15</sub> | Naringenin<br>derivative                                                                                                                                                                                                                                                                                                                                                                                                                                                                                                                                                                                                                                                                                                   |  |
| 133 | 21.08  | 285.0405 | 285.0406 | 0.45 | C <sub>15</sub> H <sub>10</sub> O <sub>6</sub>  | Luteolin isomer                                                                                                                                                                                                                                                                                                                                                                                                                                                                                                                                                                                                                                                                                                            |  |
| 134 | 21.11  | 431.0984 | 431.0985 | 0.33 | C <sub>21</sub> H <sub>20</sub> O <sub>10</sub> | Aloe Emodin 8-<br>glucoside isomer                                                                                                                                                                                                                                                                                                                                                                                                                                                                                                                                                                                                                                                                                         |  |
| 135 | 21.83  | 853.3863 | 853.3886 | 2.59 | C <sub>42</sub> H <sub>62</sub> O <sub>18</sub> | 22-Hydroxyl-<br>licorice saponin G2<br>isomer                                                                                                                                                                                                                                                                                                                                                                                                                                                                                                                                                                                                                                                                              |  |
| 136 | 21.86  | 263.1288 | 263.1292 | 1.36 | C <sub>15</sub> H <sub>20</sub> O <sub>4</sub>  | Absciscic acid isomer                                                                                                                                                                                                                                                                                                                                                                                                                                                                                                                                                                                                                                                                                                      |  |
| 137 | 22.32  | 301.0718 | 301.0720 | 0.66 | C <sub>16</sub> H <sub>14</sub> O <sub>6</sub>  | Hesperetin isomer                                                                                                                                                                                                                                                                                                                                                                                                                                                                                                                                                                                                                                                                                                          |  |
| 138 | 22.49  | 853.3863 | 853.3872 | 0.95 | C <sub>42</sub> H <sub>62</sub> O <sub>18</sub> | 22-Hydroxyl-<br>licorice saponin G2<br>isomer                                                                                                                                                                                                                                                                                                                                                                                                                                                                                                                                                                                                                                                                              |  |
| 139 | 22.96  | 853.3863 | 853.3881 | 2.02 | C <sub>42</sub> H <sub>62</sub> O <sub>18</sub> | 22-Hydroxyl-<br>licorice saponin G2<br>isomer                                                                                                                                                                                                                                                                                                                                                                                                                                                                                                                                                                                                                                                                              |  |

|     |        |          |          |       |                                                 |                                                                                            |                                                               |
|-----|--------|----------|----------|-------|-------------------------------------------------|--------------------------------------------------------------------------------------------|---------------------------------------------------------------|
| 140 | 23.25* | 269.0455 | 269.0459 | 1.20  | C <sub>15</sub> H <sub>10</sub> O <sub>5</sub>  | MS <sup>2</sup> [269]:<br>117.0334(100),<br>151.0031(40),<br>225.0551(25),<br>241.0498(9)  | Aloe emodin                                                   |
| 141 | 23.36  | 419.1337 | 419.1330 | -1.64 | C <sub>21</sub> H <sub>22</sub> O <sub>9</sub>  | MS <sup>2</sup> [419]:<br>389.0863(100),<br>404.1090(12),<br>371.0739(8)                   | 3-Hydroxy-<br>5,6,7,8,3',4'-<br>Hexamethoxyflavon<br>e isomer |
| 142 | 23.60  | 853.3863 | 853.3880 | 1.95  | C <sub>42</sub> H <sub>62</sub> O <sub>18</sub> | MS <sup>2</sup> [853]:<br>351.0569(100)                                                    | 22-Hydroxyl-<br>licorice saponin G2<br>isomer                 |
| 143 | 23.69  | 445.1140 | 445.1144 | 0.88  | C <sub>22</sub> H <sub>22</sub> O <sub>10</sub> | MS <sup>2</sup> [445]:<br>283.0614(100),<br>240.0427(10),<br>268.0394(5)                   | Oroxylin A-O-<br>glucoside                                    |
| 144 | 23.75  | 433.1140 | 433.1144 | 0.76  | C <sub>21</sub> H <sub>22</sub> O <sub>10</sub> | MS <sup>2</sup> [433]:<br>283.0613(100),<br>239.0711(20)                                   | Oroxylin A<br>derivative                                      |
| 145 | 23.87  | 459.1297 | 459.1303 | 1.33  | C <sub>23</sub> H <sub>24</sub> O <sub>10</sub> | MS <sup>2</sup> [459]:<br>255.0662(100),<br>153.0184(35),135.0077(<br>35(35), 119.0490(18) | 6'-Acetyllicquiritin<br>isomer                                |
| 146 | 24.04  | 431.0984 | 431.0985 | 0.39  | C <sub>21</sub> H <sub>20</sub> O <sub>10</sub> | MS <sup>2</sup> [431]:<br>269.0457(100),<br>225.0554(11),<br>241.0458(5)                   | Aloe Emodin 8-<br>glucoside isomer                            |
| 147 | 24.16  | 837.3914 | 837.3926 | 1.45  | C <sub>42</sub> H <sub>62</sub> O <sub>17</sub> | MS <sup>2</sup> [837]:<br>113.0232(100),<br>193.0347(28),<br>351.0573(14)                  | Licorice-saponin G2<br>isomer                                 |
| 148 | 24.27  | 445.1140 | 445.1144 | 0.81  | C <sub>22</sub> H <sub>22</sub> O <sub>10</sub> | MS <sup>2</sup> [445]:<br>283.0614(100),<br>240.0426(67),<br>239.0714(6),<br>268.0397(3)   | Oroxylin A-O-<br>glucoside                                    |



|     |       |          |           |       |                                                 |                                                                                           |                                                                                            |                                                               |
|-----|-------|----------|-----------|-------|-------------------------------------------------|-------------------------------------------------------------------------------------------|--------------------------------------------------------------------------------------------|---------------------------------------------------------------|
| 149 | 24.42 | 853.3863 | 853.3876  | 1.51  | C <sub>42</sub> H <sub>62</sub> O <sub>18</sub> | MS <sup>2</sup> [853]:<br>113.0232(100),<br>193.0350(23),<br>351.0569(23)                 |                                                                                            | 22-Hydroxyl-<br>licorice saponin G2<br>isomer                 |
| 150 | 24.46 | 389.1231 | 389.1227  | -0.91 | C <sub>20</sub> H <sub>20</sub> O <sub>8</sub>  |                                                                                           | MS <sup>2</sup> [389]:<br>359.0758(100),<br>169.0131(33),<br>197.0078(12),<br>113.0236(4)  | 3-Hydroxy-<br>5,6,7,8,4'-<br>Pentamethoxyflavan<br>one isomer |
| 151 | 24.65 | 823.4122 | 823.4139  | 2.16  | C <sub>42</sub> H <sub>64</sub> O <sub>16</sub> | MS <sup>2</sup> [823]:<br>113.0232(100),<br>193.0352(36),<br>351.0580(22)                 |                                                                                            | Licorice saponin J2<br>isomer                                 |
| 152 | 24.91 | 837.3914 | 837.3933  | 2.18  | C <sub>42</sub> H <sub>62</sub> O <sub>17</sub> | MS <sup>2</sup> [837]:<br>113.0236(100),<br>193.0347(39)                                  |                                                                                            | Licorice-saponin G2<br>isomer                                 |
| 153 | 25.10 | 419.1337 | 419.1335  | -0.43 | C <sub>21</sub> H <sub>22</sub> O <sub>9</sub>  |                                                                                           | MS <sup>2</sup> [419]:<br>389.0863(100),<br>371.0762(13),<br>404.1089(8)                   | 3-Hydroxy-<br>5,6,7,8,3',4'-<br>Hexamethoxyflavon<br>e isomer |
| 154 | 25.35 | 853.3863 | 853.3877  | 1.60  | C <sub>42</sub> H <sub>62</sub> O <sub>18</sub> | MS <sup>2</sup> [853]:<br>351.0580(100)                                                   |                                                                                            | 22-Hydroxyl-<br>licorice saponin G2<br>isomer                 |
| 155 | 25.48 | 359.1125 | 359.1124  | -0.28 | C <sub>19</sub> H <sub>18</sub> O <sub>7</sub>  |                                                                                           | MS <sup>2</sup> [359]:<br>329.0653(100),<br>183.0288(14),<br>211.0236(12),<br>286.0466(11) | 5-Hydroxy-3,6,7,8-<br>Tetramet<br>hoxyflavone isomer          |
| 156 | 25.64 | 445.1140 | 445.1144  | 0.88  | C <sub>22</sub> H <sub>22</sub> O <sub>10</sub> | MS <sup>2</sup> [445]:<br>283.0614(100)                                                   |                                                                                            | Oroxylin A-O-<br>glucoside                                    |
| 157 | 25.69 | 821.3965 | 821.39783 | 1.61  | C <sub>42</sub> H <sub>62</sub> O <sub>16</sub> | MS <sup>2</sup> [821]:<br>113.0232(100),<br>85.0282(92),<br>193.0351(32),<br>351.0582(26) |                                                                                            | Glycyrrhizic acid<br>isomer                                   |

|     |       |          |          |       |                                                 |                                                                           |                                                                                           |                                                               |
|-----|-------|----------|----------|-------|-------------------------------------------------|---------------------------------------------------------------------------|-------------------------------------------------------------------------------------------|---------------------------------------------------------------|
| 158 | 25.77 | 471.2013 | 471.2015 | 0.29  | C <sub>26</sub> H <sub>30</sub> O <sub>8</sub>  |                                                                           | MS <sup>2</sup> [471]:<br>161.0596(100),<br>425.1955(33),<br>367.1908(11)                 | Limonin isomer                                                |
| 159 | 25.78 | 431.0984 | 431.0986 | 0.53  | C <sub>21</sub> H <sub>20</sub> O <sub>10</sub> | MS <sup>2</sup> [431]:<br>283.0613(100),<br>239.0715(12),<br>269.0457(8)  |                                                                                           | Oroxylin A<br>derivative                                      |
| 160 | 25.81 | 983.4493 | 983.4486 | -0.73 | C <sub>48</sub> H <sub>72</sub> O <sub>21</sub> | MS <sup>2</sup> [983]:<br>113.0233(100),<br>193.0350(29),<br>351.0584(28) |                                                                                           | Licorice-saponin A3                                           |
| 161 | 25.85 | 389.1231 | 389.1229 | -0.60 | C <sub>20</sub> H <sub>20</sub> O <sub>8</sub>  |                                                                           | MS <sup>2</sup> [389]:<br>359.0758(100),<br>169.0130(19),<br>197.0081(15),<br>113.0241(4) | 3-Hydroxy-<br>5,6,7,8,4'-<br>Pentamethoxyflavan<br>one isomer |
| 162 | 26.04 | 837.3914 | 837.3922 | 0.94  | C <sub>42</sub> H <sub>62</sub> O <sub>17</sub> | MS <sup>2</sup> [837]:<br>113.0232(100),<br>193.0346(30),<br>351.0569(20) |                                                                                           | Licorice-saponin G2<br>isomer                                 |
| 163 | 26.06 | 359.1125 | 359.1122 | -0.89 | C <sub>19</sub> H <sub>18</sub> O <sub>7</sub>  |                                                                           | MS <sup>2</sup> [359]:<br>329.0653(100),<br>286.0467(11),                                 | 5-Hydroxy-3,6,7,8-<br>Tetramet<br>hoxylavone isomer           |
| 164 | 26.17 | 389.1231 | 389.1230 | -0.27 | C <sub>20</sub> H <sub>20</sub> O <sub>8</sub>  |                                                                           | MS <sup>2</sup> [389]:<br>359.0757(100)                                                   | 3-Hydroxy-<br>5,6,7,8,4'-<br>Pentamethoxyflavan<br>one isomer |
| 165 | 26.48 | 879.4020 | 879.4034 | 1.58  | C <sub>44</sub> H <sub>64</sub> O <sub>18</sub> | MS <sup>2</sup> [879]:<br>113.0233(100),<br>193.0347(23),<br>351.0572(18) |                                                                                           | 22-<br>Acetoxylglycrrhizin<br>isomer                          |
| 166 | 26.54 | 837.3914 | 837.3926 | 1.38  | C <sub>42</sub> H <sub>62</sub> O <sub>17</sub> | MS <sup>2</sup> [837]:<br>113.0232(100),<br>193.0350(31),<br>351.0564(25) |                                                                                           | Licorice-saponin G2<br>isomer                                 |

|     |        |          |          |       |                                                 |                                                                                          |                                                                                          |                                                               |
|-----|--------|----------|----------|-------|-------------------------------------------------|------------------------------------------------------------------------------------------|------------------------------------------------------------------------------------------|---------------------------------------------------------------|
| 167 | 26.64  | 419.1337 | 419.1336 | -0.12 | C <sub>21</sub> H <sub>22</sub> O <sub>9</sub>  |                                                                                          | MS <sup>2</sup> [419]:<br>389.0864(100),<br>404.1103(11),<br>371.0753(9)                 | 3-Hydroxy-<br>5,6,7,8,3',4'-<br>Hexamethoxyflavon<br>e isomer |
| 168 | 27.13  | 819.3809 | 819.3818 | 1.11  | C <sub>42</sub> H <sub>60</sub> O <sub>16</sub> | MS <sup>2</sup> [819]:<br>113.0232(100),<br>193.0347(28),<br>351.0572(21)                |                                                                                          | Licorice saponin E2<br>isomer                                 |
| 169 | 27.17  | 373.1282 | 373.1279 | -0.67 | C <sub>20</sub> H <sub>20</sub> O <sub>7</sub>  |                                                                                          | MS <sup>2</sup> [373]:<br>343.0809(100),<br>315.0857(16),<br>358.1042(10)                | Isosinensetin isomer                                          |
| 170 | 27.33  | 367.1187 | 367.1188 | 0.16  | C <sub>21</sub> H <sub>20</sub> O <sub>6</sub>  | MS <sup>2</sup> [367]:<br>309.0409(100),<br>297.0402(16),<br>284.0311(12)                |                                                                                          | Glycycomarin<br>isomer                                        |
| 171 | 27.36  | 837.3914 | 837.3923 | 1.08  | C <sub>42</sub> H <sub>62</sub> O <sub>17</sub> | MS <sup>2</sup> [837]:<br>113.0232(100),<br>193.0352(27),<br>351.0569(25)                |                                                                                          | Licorice-saponin G2<br>isomer                                 |
| 172 | 27.49  | 403.1387 | 403.1384 | -0.85 | C <sub>21</sub> H <sub>22</sub> O <sub>8</sub>  |                                                                                          | MS <sup>2</sup> [403]:<br>373.0914(100),<br>327.0856(47),<br>388.1141(8),<br>355.0818(6) | Nobiletin isomer                                              |
| 173 | 27.59  | 879.4020 | 879.4031 | 1.31  | C <sub>44</sub> H <sub>64</sub> O <sub>18</sub> | MS <sup>2</sup> [879]:<br>113.0233(100),<br>193.0346(19),<br>351.0532(16)                |                                                                                          | 22-<br>Acetoxylglycyrrhizin<br>isomer                         |
| 174 | 27.71* | 283.0612 | 283.0615 | 1.04  | C <sub>16</sub> H <sub>12</sub> O <sub>5</sub>  | MS <sup>2</sup> [283]:<br>268.0378(100),<br>163.0027(20),<br>239.0346(4),<br>211.0394(2) |                                                                                          | Wogonin                                                       |

|     |        |          |          |       |                                                 |                                                                                        |                                                               |
|-----|--------|----------|----------|-------|-------------------------------------------------|----------------------------------------------------------------------------------------|---------------------------------------------------------------|
| 175 | 27.71  | 285.0768 | 285.0769 | 0.19  | C <sub>16</sub> H <sub>14</sub> O <sub>5</sub>  | MS <sup>2</sup> [285]:<br>164.0107(100),<br>151.0027(46)                               | Sakuranetin isomer                                            |
| 176 | 27.77  | 837.3914 | 837.3918 | 0.43  | C <sub>42</sub> H <sub>62</sub> O <sub>17</sub> | MS <sup>2</sup> [837]:113.0232(100),<br>193.0349(27),<br>351.0566(20)                  | Licorice-saponin G2 isomer                                    |
| 177 | 27.90  | 373.1282 | 373.1278 | -1.07 | C <sub>20</sub> H <sub>20</sub> O <sub>7</sub>  | MS <sup>2</sup> [373]:<br>343.0809(100),<br>315.0859(34),<br>358.1044(14)              | Isosinensetin isomer                                          |
| 178 | 28.00  | 863.4071 | 863.4080 | 1.10  | C <sub>44</sub> H <sub>64</sub> O <sub>17</sub> | MS <sup>2</sup> [863]:<br>351.0573(100)                                                | 22β-acetoxylglycyrrhald<br>ehyde isomer                       |
| 179 | 28.15  | 283.0612 | 283.0614 | 0.61  | C <sub>16</sub> H <sub>12</sub> O <sub>5</sub>  | MS <sup>2</sup> [283]:<br>240.0455(100),<br>268.0367(2)                                | Oroxylin A isomer                                             |
| 180 | 28.29  | 837.3914 | 837.3921 | 0.80  | C <sub>42</sub> H <sub>62</sub> O <sub>17</sub> | MS <sup>2</sup> [837]:<br>113.0232(100),<br>351.0568(28),<br>193.0345(10)              | Licorice-saponin G2 isomer                                    |
| 181 | 28.33  | 403.1387 | 403.1382 | -1.47 | C <sub>21</sub> H <sub>22</sub> O <sub>8</sub>  | MS <sup>2</sup> [403]:<br>373.0913(100),<br>3355.0808(21),327.08<br>53(10), 88.1154(7) | Nobiletin isomer                                              |
| 182 | 28.39  | 389.1231 | 389.1226 | -1.30 | C <sub>20</sub> H <sub>20</sub> O <sub>8</sub>  | MS <sup>2</sup> [389]:<br>359.0756(100)                                                | 3-Hydroxy-<br>5,6,7,8,4'-<br>Pentamethoxyflavan<br>one isomer |
| 183 | 28.73* | 283.0612 | 283.0613 | 0.29  | C <sub>16</sub> H <sub>12</sub> O <sub>5</sub>  | MS <sup>2</sup> [283]:<br>239.0712(100),<br>238.0633(29),<br>240.0426(22)              | Oroxylin A                                                    |
| 184 | 28.74  | 373.1282 | 373.1279 | -0.83 | C <sub>20</sub> H <sub>20</sub> O <sub>7</sub>  | MS <sup>2</sup> [373]:<br>343.0810(100),<br>358.1043(30),<br>315.0862(20)              | Isosinensetin isomer                                          |

|     |        |          |          |       |                                                 |                                                                                           |                                                                                          |                                                    |
|-----|--------|----------|----------|-------|-------------------------------------------------|-------------------------------------------------------------------------------------------|------------------------------------------------------------------------------------------|----------------------------------------------------|
| 185 | 28.74  | 375.1074 | 375.1071 | -0.94 | C <sub>19</sub> H <sub>18</sub> O <sub>8</sub>  |                                                                                           | MS <sup>2</sup> [375]:<br>345.0598(100),<br>327.0494(43)                                 | 6,7,8,3',4'-<br>Pentamethoxy<br>flavanone isomer   |
| 186 | 28.96* | 821.3965 | 821.3970 | 0.56  | C <sub>42</sub> H <sub>62</sub> O <sub>16</sub> | MS <sup>2</sup> [821]:<br>113.0232(100),<br>85.0282(76),<br>193.0348(25),<br>351.0562(16) |                                                                                          | Glycyrrhizic acid                                  |
| 187 | 29.08  | 837.3914 | 821.3973 | 0.94  | C <sub>42</sub> H <sub>62</sub> O <sub>17</sub> | MS <sup>2</sup> [837]:<br>113.0233(100),<br>193.0348(27),<br>351.0583(20)                 |                                                                                          | Licorice-saponin G2<br>isomer                      |
| 188 | 29.12* | 403.1387 | 403.1381 | -1.70 | C <sub>21</sub> H <sub>22</sub> O <sub>8</sub>  |                                                                                           | MS <sup>2</sup> [403]:<br>373.0915(100),<br>327.0853(10),<br>388.1141(8),<br>355.0804(5) | Nobiletin                                          |
| 189 | 29.15  | 343.1176 | 343.1170 | -1.70 | C <sub>19</sub> H <sub>18</sub> O <sub>6</sub>  |                                                                                           | MS <sup>2</sup> [343]:<br>313.0703(100),<br>285.0755(23),153.018<br>1(18), 133.0647(8)   | 5,7,3',4'-<br>Tetramethoxy<br>flavone isomer       |
| 190 | 29.50  | 373.1282 | 373.1277 | -1.23 | C <sub>20</sub> H <sub>20</sub> O <sub>7</sub>  |                                                                                           | MS <sup>2</sup> [373]:<br>343.0809(100),<br>315.0859(8),<br>358.1044(8)                  | Isosinensetin isomer                               |
| 191 | 29.51  | 863.4071 | 863.4078 | 0.89  | C <sub>44</sub> H <sub>64</sub> O <sub>17</sub> | MS <sup>2</sup> [863]:<br>351.0576(100),<br>193.0349(18)                                  |                                                                                          | 22β-<br>acetoxylglycyrrhald<br>ehyde isomer        |
| 192 | 29.57  | 821.3965 | 821.3973 | 0.94  | C <sub>42</sub> H <sub>62</sub> O <sub>16</sub> | MS <sup>2</sup> [821]:<br>113.0232(100),<br>85.0282(80),<br>193.0348(27),<br>351.0572(17) |                                                                                          | Glycyrrhizic acid<br>isomer                        |
| 193 | 29.61  | 433.1493 | 433.1488 | -1.11 | C <sub>22</sub> H <sub>24</sub> O <sub>9</sub>  |                                                                                           | MS <sup>2</sup> [433]:<br>403.1019(100),                                                 | 3,5,6,7,8,3',4'-<br>Heptamethoxyflavo<br>ne isomer |

|     |       |          |          |       |                                                 |                                                                                                                                                                                                                      |                                              |
|-----|-------|----------|----------|-------|-------------------------------------------------|----------------------------------------------------------------------------------------------------------------------------------------------------------------------------------------------------------------------|----------------------------------------------|
| 194 | 29.73 | 343.1176 | 343.1173 | -0.89 | C <sub>19</sub> H <sub>18</sub> O <sub>6</sub>  | 385.0909(11),<br>418.1254(8)<br>MS <sup>2</sup> [343]:<br>313.0701(100),<br>285.0754(34),153.018<br>2(22), 133.0648(13)<br>MS <sup>2</sup> [403]:<br>373.0914(100),<br>327.0858(12),<br>388.1151(10),<br>355.0811(6) | 5,7,3',4'-<br>Tetramethoxy<br>flavone isomer |
| 195 | 29.75 | 403.1387 | 403.1384 | -0.85 | C <sub>21</sub> H <sub>22</sub> O <sub>8</sub>  |                                                                                                                                                                                                                      | Nobiletin isomer                             |
| 196 | 29.83 | 863.4071 | 863.4080 | 1.10  | C <sub>44</sub> H <sub>64</sub> O <sub>17</sub> | MS <sup>2</sup> [863]:<br>113.0232(100),<br>193.0347(28),<br>351.0572(17)                                                                                                                                            | 22β-<br>acetoxylglycyrrhald<br>ehyde isomer  |
| 197 | 29.86 | 367.1187 | 367.1189 | 0.43  | C <sub>21</sub> H <sub>20</sub> O <sub>6</sub>  | MS <sup>2</sup> [367]:<br>309.0406(100),<br>297.0406(32),<br>284.0327(11)<br>MS <sup>2</sup> [821]:<br>113.0232(100),<br>85.0282(89),<br>351.0575(25),<br>193.0348(23)                                               | Glycycomarin<br>isomer                       |
| 198 | 29.88 | 821.3965 | 821.3974 | 1.09  | C <sub>42</sub> H <sub>62</sub> O <sub>16</sub> | MS <sup>2</sup> [823]:<br>113.0232(100),<br>193.0343(28),<br>351.0575(28)                                                                                                                                            | Glycyrrhizic acid<br>isomer                  |
| 199 | 30.20 | 823.4122 | 823.4130 | 1.05  | C <sub>42</sub> H <sub>64</sub> O <sub>16</sub> |                                                                                                                                                                                                                      | Licorice saponin J2<br>isomer                |
| 200 | 30.23 | 863.4071 | 863.4082 | 1.31  | C <sub>44</sub> H <sub>64</sub> O <sub>17</sub> | MS <sup>2</sup> [863]:<br>351.0573(100)                                                                                                                                                                              | 22β-<br>acetoxylglycyrrhald<br>ehyde isomer  |
| 201 | 30.31 | 373.1282 | 373.1278 | -1.07 | C <sub>20</sub> H <sub>20</sub> O <sub>7</sub>  | MS <sup>2</sup> [373]:<br>343.0809(100),<br>315.0864(19),<br>358.1061(9)                                                                                                                                             | Isosinensetin isomer                         |

|     |       |          |          |       |                                                 |                                                                                           |                                                               |
|-----|-------|----------|----------|-------|-------------------------------------------------|-------------------------------------------------------------------------------------------|---------------------------------------------------------------|
| 202 | 30.81 | 821.3965 | 821.3975 | 1.23  | C <sub>42</sub> H <sub>62</sub> O <sub>16</sub> | MS <sup>2</sup> [821]:<br>113.0232(100),<br>85.0282(79),<br>193.0349(32),<br>351.0567(27) | Glycyrrhizic acid<br>isomer                                   |
| 203 | 30.86 | 373.1282 | 373.1277 | -1.23 | C <sub>20</sub> H <sub>20</sub> O <sub>7</sub>  | MS <sup>2</sup> [373]:<br>343.0808(100),<br>358.1048(8),<br>315.0861(4)                   | Isosinensetin isomer                                          |
| 204 | 31.13 | 381.1344 | 381.1350 | 0.42  | C <sub>22</sub> H <sub>22</sub> O <sub>6</sub>  | MS <sup>2</sup> [381]:<br>323.0561(100),<br>351.0873(33),<br>311.0564(29)                 | Licoricone isomer                                             |
| 205 | 31.16 | 823.4122 | 823.4132 | 1.20  | C <sub>42</sub> H <sub>64</sub> O <sub>16</sub> | MS <sup>2</sup> [823]:<br>113.0232(100),<br>193.0349(28),<br>351.0580(26)                 | Licorice saponin J2<br>isomer                                 |
| 206 | 31.19 | 805.4016 | 805.4026 | 1.24  | C <sub>42</sub> H <sub>62</sub> O <sub>15</sub> | MS <sup>2</sup> [805]:<br>351.0572(100)                                                   | Licorice saponin C2<br>isomer                                 |
| 207 | 31.47 | 403.1387 | 403.1385 | -0.71 | C <sub>21</sub> H <sub>22</sub> O <sub>8</sub>  | MS <sup>2</sup> [403]:<br>373.0914(100),<br>355.0808(11),<br>388.1151(10),<br>327.0856(3) | Nobiletin isomer                                              |
| 208 | 31.61 | 389.1231 | 389.1229 | -0.60 | C <sub>20</sub> H <sub>20</sub> O <sub>8</sub>  | MS <sup>2</sup> [389]:<br>359.0757(100),<br>169.0130(22),<br>197.0080(21),<br>113.0238(4) | 3-Hydroxy-<br>5,6,7,8,4'-<br>Pentamethoxyflavan<br>one isomer |
| 209 | 31.75 | 823.4122 | 823.4131 | 1.13  | C <sub>42</sub> H <sub>64</sub> O <sub>16</sub> | MS <sup>2</sup> [823]:113.0232(100),<br>351.0578(36),<br>193.0336(34)                     | Licorice saponin J2<br>isomer                                 |
| 210 | 31.83 | 821.3965 | 821.3977 | 1.46  | C <sub>42</sub> H <sub>62</sub> O <sub>16</sub> | MS <sup>2</sup> [821]:<br>113.0233(100),<br>85.0281(97),                                  | Glycyrrhizic acid<br>isomer                                   |

|     |        |          |           |       |                                                 |                                                                                                     |                                                          |                                                               |
|-----|--------|----------|-----------|-------|-------------------------------------------------|-----------------------------------------------------------------------------------------------------|----------------------------------------------------------|---------------------------------------------------------------|
|     |        |          |           |       |                                                 | 351.0580(30),<br>193.0347(30)<br>MS <sup>2</sup> [593]:                                             |                                                          |                                                               |
| 211 | 31.86* | 593.1301 | 593.1305  | 0.72  | C <sub>30</sub> H <sub>26</sub> O <sub>13</sub> | 209.0450(100),<br>121.0283(10)<br>MS <sup>2</sup> [269]:                                            |                                                          | Proanthocyanidins                                             |
| 212 | 32.15* | 269.0455 | 269.0456  | 0.27  | C <sub>15</sub> H <sub>10</sub> O <sub>5</sub>  | 225.0553(100),<br>241.0504(33)                                                                      |                                                          | Emodin                                                        |
| 213 | 32.25  | 389.1231 | 389.1228  | -0.68 | C <sub>20</sub> H <sub>20</sub> O <sub>8</sub>  |                                                                                                     | MS <sup>2</sup> [389]:<br>359.0757(100),<br>169.0121(2)  | 3-Hydroxy-<br>5,6,7,8,4'-<br>Pentamethoxyflavan<br>one isomer |
| 214 | 32.56  | 823.4122 | 823.41266 | 0.61  | C <sub>42</sub> H <sub>64</sub> O <sub>16</sub> | MS <sup>2</sup> [823]:<br>113.0231(100),<br>193.0349(34),<br>351.0569(32)<br>MS <sup>2</sup> [365]: |                                                          | Licorice saponin J2<br>isomer                                 |
| 215 | 32.59  | 365.1031 | 365.1032  | 0.24  | C <sub>21</sub> H <sub>18</sub> O <sub>6</sub>  | 307.0249(100),<br>295.0248(42)<br>MS <sup>2</sup> [805]:                                            |                                                          | Glycyrol isomer                                               |
| 216 | 32.88  | 805.4016 | 805.4026  | 1.24  | C <sub>42</sub> H <sub>62</sub> O <sub>15</sub> | 113.0232(100),<br>351.0382(33),<br>193.0388(20)<br>MS <sup>2</sup> [351]:                           |                                                          | Licorice saponin C2<br>isomer                                 |
| 217 | 33.05  | 351.0874 | 351.0876  | 0.594 | C <sub>20</sub> H <sub>16</sub> O <sub>6</sub>  | 283.0977(100),<br>199.07756(41),<br>241.0866(31),<br>265.0871(21)                                   |                                                          | Licoisoflavone B<br>isomer                                    |
| 218 | 33.15  | 359.1125 | 359.1123  | -0.72 | C <sub>19</sub> H <sub>18</sub> O <sub>7</sub>  |                                                                                                     | MS <sup>2</sup> [359]:<br>329.0652(100),<br>286.0460(12) | 5-Hydroxy-3,6,7,8-<br>Tetramet<br>hoxylavone isomer           |
| 219 | 33.23  | 805.4016 | 805.4027  | 1.31  | C <sub>42</sub> H <sub>62</sub> O <sub>15</sub> | MS <sup>2</sup> [805]:<br>351.0567(100)<br>MS <sup>2</sup> [283]:                                   |                                                          | Licorice saponin C2<br>isomer                                 |
| 220 | 34.69  | 283.0612 | 283.0613  | 0.40  | C <sub>16</sub> H <sub>12</sub> O <sub>5</sub>  | 255.0662(100),<br>239.0710(51),                                                                     |                                                          | Oroxylin A isomer                                             |



|     |        |          |          |       |                                                |                                                                                                                                                                                                          |                   |
|-----|--------|----------|----------|-------|------------------------------------------------|----------------------------------------------------------------------------------------------------------------------------------------------------------------------------------------------------------|-------------------|
|     |        |          |          |       |                                                | 241.0506(24),<br>211.0760(13)<br>MS <sup>2</sup> [283]:<br>239.0710(100),<br>255.0662(79),<br>224.0471(11)<br>MS <sup>2</sup> [455]:<br>391.2349(100),<br>409.2440(16),<br>349.8991(10),<br>308.9463(10) |                   |
| 221 | 34.95  | 283.0612 | 283.0613 | 0.29  | C <sub>16</sub> H <sub>12</sub> O <sub>5</sub> |                                                                                                                                                                                                          | Oroxylin A isomer |
| 222 | 40.04* | 455.3531 | 455.3526 | -1.03 | C <sub>30</sub> H <sub>48</sub> O <sub>3</sub> |                                                                                                                                                                                                          | Oleanic acid      |

\* With standard references.

Supplementary Table S2: Detailed information of the 40 standards in Tojapride

| Name                       | Formula                                         | Purity   | Article number | Company                   |
|----------------------------|-------------------------------------------------|----------|----------------|---------------------------|
| Liquiritin                 | C <sub>21</sub> H <sub>22</sub> O <sub>9</sub>  | HPLC>98% | 114905186      | Sigma-aldrich             |
| Isoliquiritin              | C <sub>15</sub> H <sub>10</sub> O <sub>6</sub>  | HPLC>98% | 104288219      | Sigma-aldrich             |
| Orientin                   | C <sub>21</sub> H <sub>20</sub> O <sub>11</sub> | HPLC>98% | H-044-181025   | Chengdu Herpurify Co.,Ltd |
| Luteolin 7-O-β-D-glucoside | C <sub>21</sub> H <sub>20</sub> O <sub>11</sub> | HPLC>98% | M-025-181025   | Chengdu Herpurify Co.,Ltd |
| Luteolin                   | C <sub>15</sub> H <sub>10</sub> O <sub>6</sub>  | HPLC>98% | M-007-190422   | Chengdu Herpurify Co.,Ltd |
| Calycosin                  | C <sub>16</sub> H <sub>12</sub> O <sub>5</sub>  | HPLC>98% | M-021          | Chengdu Herpurify Co.,Ltd |

|                                 |                                                 |          |               |                                               |
|---------------------------------|-------------------------------------------------|----------|---------------|-----------------------------------------------|
| Wogonin                         | C <sub>16</sub> H <sub>12</sub> O <sub>5</sub>  | HPLC>98% | 98817832      | Sigma-aldrich                                 |
| Oroxylin A                      | C <sub>16</sub> H <sub>12</sub> O <sub>5</sub>  | HPLC>98% | Q-020         | Chengdu Herpurify Co.,Ltd                     |
| Kaempferol 3-O-neohesperidoside | C <sub>27</sub> H <sub>30</sub> O <sub>15</sub> | HPLC>98% | CFS201901     | Wuhan chemfaces biochemical company           |
| Nicotiflorin                    | C <sub>27</sub> H <sub>30</sub> O <sub>15</sub> | HPLC>98% | CFN99830      | Wuhan chemfaces biochemical company           |
| Hyperoside                      | C <sub>21</sub> H <sub>20</sub> O <sub>12</sub> | HPLC>98% | 111521-201507 | National Institutes for Food and Drug Control |
| Isoquercitrin                   | C <sub>21</sub> H <sub>20</sub> O <sub>12</sub> | HPLC>98% | Y-076-181025  | Chengdu Herpurify Co.,Ltd                     |
| Rutin                           | C <sub>27</sub> H <sub>30</sub> O <sub>16</sub> | HPLC>98% | AF8032520     | Chengdu Alfa Biotechnology Co.,Ltd.           |
| Baicalin                        | C <sub>21</sub> H <sub>18</sub> O <sub>11</sub> | HPLC>98% | DST190312-024 | Chengdu desite biological technology co ltd   |
| Hesperidin                      | C <sub>28</sub> H <sub>34</sub> O <sub>15</sub> | HPLC>98% | MUST-14081916 | Chengdu mustbio-technology Co.,Ltd            |
| Vitexin                         | C <sub>15</sub> H <sub>10</sub> O <sub>5</sub>  | HPLC>98% | M-023-181025  | Chengdu Herpurify Co.,Ltd                     |
| Quercetin                       | C <sub>15</sub> H <sub>10</sub> O <sub>7</sub>  | HPLC>98% | C28J11Y116820 | Shanghai yuanye Bio-Technology Co., Ltd       |
| Eriodictyol                     | C <sub>15</sub> H <sub>12</sub> O <sub>6</sub>  | HPLC>98% | PS1160-0025   | Chengdu Push Bio-technology Co.,Ltd           |
| Naringenin                      | C <sub>15</sub> H <sub>12</sub> O <sub>5</sub>  | HPLC>98% | YJ0603HA13    | Shanghai yuanye Bio-Technology Co., Ltd       |

|                           |                                                      |          |               |                                                           |
|---------------------------|------------------------------------------------------|----------|---------------|-----------------------------------------------------------|
| Nobiletin                 | C <sub>21</sub> H <sub>22</sub> O <sub>8</sub>       | HPLC>98% | C-015         | Chengdu Herpurify Co.,Ltd                                 |
| Aloe emodin               | C <sub>15</sub> H <sub>10</sub> O <sub>5</sub>       | HPLC>98% | PCSO253       | Chengdu HerbSubstance Co.,Ltd                             |
| Emodin                    | C <sub>15</sub> H <sub>10</sub> O <sub>5</sub>       | HPLC>98% | PCSO247       | Chengdu HerbSubstance Co.,Ltd                             |
| Proanthocyanidins         | C <sub>30</sub> H <sub>26</sub> O <sub>13</sub>      | HPLC>98% | wkq19050610   | Sichuan Weikeqi Biotechnology Co.,<br>Ltd.                |
| Magnoflorine              | C <sub>20</sub> H <sub>24</sub> NO <sub>4</sub><br>+ | HPLC>98% | DST200519-004 | Chengdu Lemeitian Pharmaceutical Techn<br>ology Co., Ltd. |
| Chlorogenic acid          | C <sub>16</sub> H <sub>18</sub> O <sub>9</sub>       | HPLC>98% | L-007-171216  | Chengdu Herpurify Co.,Ltd                                 |
| Cryptochlorogenic<br>acid | C <sub>16</sub> H <sub>18</sub> O <sub>9</sub>       | HPLC>98% | Y-067-180425  | Chengdu Herpurify Co.,Ltd                                 |
| Caffeic acid              | C <sub>9</sub> H <sub>8</sub> O <sub>4</sub>         | HPLC>98% | K-003         | Chengdu Herpurify Co.,Ltd                                 |
| Isoferulic acid           | C <sub>10</sub> H <sub>10</sub> O <sub>4</sub>       | HPLC>98% | 11698-201103  | National Institutes for Food and Drug<br>Control          |
| Azelaic acid              | C <sub>9</sub> H <sub>16</sub> O <sub>4</sub>        | HPLC>98% | R-064         | Chengdu Herpurify Co.,Ltd                                 |
| Octanedioic acid          | C <sub>8</sub> H <sub>14</sub> O <sub>4</sub>        | HPLC>98% | X-099         | Chengdu Herpurify Co.,Ltd                                 |
| Malic Acid                | C <sub>4</sub> H <sub>6</sub> O <sub>5</sub>         | HPLC>98% | P-013         | Chengdu Herpurify Co.,Ltd                                 |

|                     |                                                 |          |               |                                                  |
|---------------------|-------------------------------------------------|----------|---------------|--------------------------------------------------|
| Salicylic acid      | C <sub>7</sub> H <sub>6</sub> O <sub>3</sub>    | HPLC>98% | H31A10B96399  | Shanghai yuanye Bio-Technology Co., Ltd          |
| Citraconic acid     | C <sub>5</sub> H <sub>6</sub> O <sub>4</sub>    | HPLC>98% | N-060         | Chengdu Herpurify Co.,Ltd                        |
| Gallic acid         | C <sub>7</sub> H <sub>6</sub> O <sub>5</sub>    | HPLC>98% | PCS0637       | Chengdu HerbSubstance Co.,Ltd                    |
| Protocatechuic acid | C <sub>15</sub> H <sub>20</sub> O <sub>4</sub>  | HPLC>98% | Y-031         | Chengdu Herpurify Co.,Ltd                        |
| Absciscic acid      | C <sub>15</sub> H <sub>20</sub> O <sub>4</sub>  | HPLC>98% | T-048         | Chengdu Herpurify Co.,Ltd                        |
| Quinic acid         | C <sub>7</sub> H <sub>12</sub> O <sub>6</sub>   | HPLC>98% | A06N11L130218 | Shanghai yuanye Bio-Technology Co., Ltd          |
| Methyl gallate      | C <sub>8</sub> H <sub>8</sub> O <sub>5</sub>    | HPLC>98% | PCS0634       | Chengdu HerbSubstance Co.,Ltd                    |
| Glycyrrhizic acid   | C <sub>42</sub> H <sub>62</sub> O <sub>16</sub> | HPLC>98% | 100486660     | Sigma-aldrich                                    |
| Oleanic acid        | C <sub>30</sub> H <sub>48</sub> O <sub>3</sub>  | HPLC>98% | 110709-201206 | National Institutes for Food and Drug<br>Control |
